# Supplementary material
Source: publisher figshare collection journal article supplement (https://gsapubs.figshare.com/articles/dataset/_/17118842)
Supplement: Supplementary file 1 [file 1]

## Sheet: Raw and Standardized Abundance
Raw Abundance & Abundace Standardization
Methods for Counting Disaarticulated Bivalves
x/2 if identifiable at genus level
x/3 if indetermiante
Methods for counting fragmented inoceramids:
1-2 cm	0.166667
2-3 cm	0.333333
3-4 cm	0.5
4-5 cm	0.666667
5-6 cm	0.833333
>6	1
		Locality			Raw Abundance		1 m/ total volume
		Seep: 3504A-A (left of main micritic mass)		Horizon	*corrected for disartuclated bivalves	Total Volume (cubic meters)	X (to m3)	Standardized	Plus 1	Total Abundance	Species Abundance	Species Richness
			Collection dimensions (meters): 0.5 x 0.5 x 0.125	1.0-.875 Above		V=.03125	32
				Nymphalucina occidentalis	30.5			97.6	98.6	189.272	111.2	4
				Inoceramus altusiformis	1			3.2	4.2
				Baculites compressus	1			3.2	4.2
				Baculites sp.	3			9.6	10.6
				Trachytriton vinculum	1			3.2	4.2
				Inoceramus sp.	2.86			9.152	10.152
				INDET bivalves	17.6			56.32	57.32
			Collection dimensions (meters): 0.5 x 0.5 x 0.125	0.875-0.75 m Above
				Nymphalucina occidentalis	40.5	V=.03125	32	129.6	130.6	233.12	147.4	5
				Gervillia sp.1	1			3.2	4.2
				Syncyclomena halli	1			3.2	4.2
				Baculites compressus	1			3.2	4.2
				Euspira obliquata	1			3.2	4.2
				Inoceramus sp.	2.85			9.12	10.12
				INDET. bivalves	21			67.2	68.2
				Other/Indeterminate	2			6.4	7.4
			Collection dimensions (meters): 0.5 x 0.5 x 0.125	0.75-0.625 m Above		V=.03125	32
				Nymphalucina occidentalis	4.5			14.4	15.4	78.976	19.6	2
				Baculites compressus	1			3.2	4.2
				Inoceramus sp.	16.26			52.032	53.032
				INDET. bivalves	1.67			5.344	6.344
				Other/Indeterminate	4
				0.625-0.5 m Above		V=.025	40
			Collection dimensions (meters): 0.4 x 0.5 x 0.125	Nymphalucina occidentalis	18			72	73	225.72	96	4
				Nuculana scitula	3			12	13
				Ostrea translucida	1			4	5
				Baculites sp.	1			4	5
				Baculites corrugatus	1			4	5
				Inoceramus sp.	4.93			19.72	20.72
				INDET. Gpod	1			4	5
				INDET. bivalves	14			56	57
				Crab fragment/claw	1			4	5
				Other/Indeterminate	9			36	37
			Collection dimensions (meters): 0.4 x 0.5 x 0.125	0.5-0.375 Above		V=.025	40
				Nymphalucina occidentalis	10.5			42	43	109.8	67	5
				Nuculana scitula	1			4	5
				Nuculana gardensis	1			4	5
				Syncyclomena halli	1			4	5
				Ostrea translucida	2			8	9
				Inoceramus sp.	2.2			8.8	9.8
				INDET. bivalves	8			32	33
			Collection dimensions (meters): 0.4 x 0.5 x 0.125	0.375-0.25 m Above		V=.025	40
				Nymphalucina occidentalis	22			88	89	148.76	119	7
				Parapholus sp. A?	1			4	5
				Nuculana gardensis	1			4	5
				Syncyclomena halli	1			4	5
				Ostrea translucida	1			4	5
				Clisocolus (moreauensis?)	1			4	5
				Bivalve sp. 2	1			4	5
				Inoceramus sp.	2.99			11.96	12.96
				Baculites corrugatus	1			4	5
				INDET. bivalves	2.7			10.8	11.8
			Collection dimensions (meters): 0.4 x 0.5 x 0.125	0.25-0.125 m Above		V=.025	40
				Nymphalucina occidentalis	13			52	53	110.16	63	3
				Nuculana scitula	1			4	5
				Baculites compressus	1			4	5
				Inoceramus sp.	2.34			9.36	10.36
				INDET. bivalves	4.7			18.8	19.8
				Other/Indeterminate	4			16	17
			Collection dimensions (meters): 0.5 x 0.5 x 0.125	0.125-0 m Above		V=.03125	32
				Nymphalucina occidentalis	15			48	49	174.608	79	7
				Solemaya subplicata	2			6.4	7.4
				Bivalve sp. 2	0.5			1.6	2.6
				Euspria obliquata	2			6.4	7.4
				Anisomyon borealis	1			3.2	4.2
				Micrabacia americana	1			3.2	4.2
				Coral sp 1.	1			3.2	4.2
				Inoceramus sp.	1.34			4.288	5.288
				INDET. bivalves	21.6			69.12	70.12
				Other/Indeterminate	6			19.2	20.2
			Collection dimensions (meters): 0.5 x 0.5 x 0.125	Bentonite (0 m)		V=.03125	32
				Nymphalucina occidentalis	4			12.8	13.8	26.912	22.2	3
				Baculites compressus	1			3.2	4.2
				Hoploscaphites brevis	1			3.2	4.2
				Inoceramus sp.	1.16			3.712	4.712
			Collection dimensions (meters) 0.5 x 0.5 x 0.125	0-0.125 m Below		V=.03125	32
				Nymphalucina occidentalis	5			16	17	53.72	29.6	4
				Syncyclomena halli	1			3.2	4.2
				Cymbophora nitidula	1			3.2	4.2
				Baculites compressus	1			3.2	4.2
				Inoceramus sp.	0.3			0.96	1.96
				INDET. bivalves	4.3			13.76	14.76
				Other/Indeterminate	2			6.4	7.4
			Collection dimensions (meters) 0.5 x 0.5 x 0.125	0.125-0.25 m Below		V=.03125	32
				Nymphalucina occidentalis	11			35.2	36.2	145.272	58.2	7
				Nuculana scitula	1			3.2	4.2
				Modiolus sp 1.	1			3.2	4.2
				Inoceramus altus	1			3.2	4.2
				Baculites compressus	1			3.2	4.2
				Bivale sp. 1	0.5			1.6	2.6
				Bivalve sp. 2	0.5			1.6	2.6
				Baculites sp.	1			3.2	4.2
				Inoceramus sp.	4.96			15.872	16.872
				INDET. bivalves	10			32	33
				Other/Indeterminate	10			32	33
			Collection dimensions: 0.5 x 0.5 x 0.125	0.25-0.375 m Below		V=.03125	32
				Nymphalucina occidentalis	10			32	33	59.36	37.2	2
				Anomia gryphorhyncha	1			3.2	4.2
				INDET. bivalves	3.3			10.56	11.56
				Other/Indeterminate	3			9.6	10.6
			Collection dimensions (meters): 0.5 x 0.5 x 0.125	0.5-0.375 m Below		V=.03125	32
				Nymphalucina occidentalis	2			6.4	7.4	22.0288	11.6	2
				Micrabacia americana	1			3.2	4.2
				Inoceramus sp.	0.334			1.0688	2.0688
				INDET. bivalves	2.3			7.36	8.36
		Locality
		Seep: 3504A-A' (right of main micritic mass)			Raw Abundance
				Horizon	*corrected for disartuclated bivalves	Total Volume (cubic meters)	X (to m3)	Standardized	Total Abundance	Species Abundance	Species Richness
			Sample dimensions (meters) 0.5 x 0.4 x 0.125	1.0-.875 Above		V=0.025	40
				Nymphalucina occidentalis	28			113	388.6	260	11
				"Cataceramus" gandjaensis	1			5
				Syncyclomena halli	1			5
				Nuculana scitula	1			5
				Nucula sp 1.	1			5
				Hoploscaphites brevis	1			5
				Hoploscaphites nodosus	2			9
				Hoploscaphites sp.	3			13
				Fragmented ammonite	1			5
				Baculites compressus	7			29
				Baculites sp.	10			41
				Astandes densatus	1			5
				Vanikoropsis nebrascensis	3			13
				Cryptorhytis cheyennensis	1			5
				Inoceramus sp.	17.6			71.4
				INDET. bivalves	11.3			46.2
				Crab frags, claw/legs	3			13
			Sample dimensions (meters): 1.0 x 0.5 x 0.125	0.875-0.75 m Above		0.0625	16
				Nymphalucina occidentalis	27			44.2	222.448	99	11
				Pteria linguiformis	3			5.8
				Anomia gryphorhyncha	1			2.6
				Ostrea translucida	1			2.6
				Parallelodon sulcatinus	1			2.6
				Protocardia subquadrata	1			2.6
				Baculites compressus	15			25
				Baculites sp.	1			2.6
				Hoploscaphites brevis	3			5.8
				Drepanochilus nebrascensis	1			2.6
				Euspira obliquata	1			2.6
				Inoceramus nebrascensis	1			2.6
				Inoceramus sp.	40.12			65.192
				worm tube	1			2.6
				Crab fragment	1			2.6
				bryozoan	1			2.6
				INDET. bivalves	18.66			30.856
				Other/Indeterminate	10			17
			Sample dimensions (meters): 0.5 x 0.4 x 0.125	0.75-0.5 m Above		0.025	40
				Nymphalucina occidentalis	11			45	133.2	55	3
				Nuculana scitula	1			5
				Hoploscaphites brevis	1			5
				Inoceramus sp.	3.2			13.8
				INDET. bivalves	11.6			47.4
				Other/Indeterminate	4			17
			Sample dimensions (meters): 1.0 x 0.5 x 0.125	0.5-0.375 m Above		0.0625	16
				Ostrea translucida	2			4.2	51.528	9.4	3
				Limopsis parvula	1			2.6
				Inoceramus convexus	1			2.6
				Inoceramus sp.	11.78			19.848
				INDET. bivalves	13.3			22.28
			Sample dimensions (meters): 1.0 x 0.5 x 0.125	0.375-0.25 m Above		0.0625	16
				Nymphalucina occidentalis	4.5			8.2	35.4	13.4	3
				Nuculana scitula	1			2.6
				Pteria linguiformis	1			2.6
				Inoceramus sp.	6			10.6
				INDET. bivalves	6.5			11.4
			Sample dimensions (meters): 1.0 x 0.5 x 0.125	0.25-0.125 m Above		0.0625	16
				Nymphalucina occidentalis	2			4.2	34.304	9.4	3
				Hoploscaphites brevis	1			2.6
				Eutrephoceras dekayi nebrascensis	1			2.6
				Inoceramus sp.	14.94			24.904
			Sample dimensions (meters): 1.0 x 0.5 x 0.125	0.125-0 m Above		0.0625	16
				Nymphalucina occidentalis	1.5			3.4	36.248	3.4	1
				Inoceramus sp.	18.28			30.248
				INDET. bivalves	1			2.6
			Sample dimensions (meters): 1.0 x 0.5 x 0.125	Bentonite (0 m)		0.0625	16
				Nymphalucina occidentalis	9.5			16.2	35.3456	21.4	3
				Baculites compressus	1			2.6
				Micrabacia americana	1			2.6
				Inoceramus sp.	0.166			1.2656
				INDET. bivalves	7.3			12.68
			Sample dimensions (meters): 0.5 x 0.4 x 0.125	0-0.125 m Below		0.025	40
				Nymphalucina occidentalis	11			45	128.64	64	4
				Crytodaria minuta	1			5
				Margaritella sp 1.	1			5
				Baculites compressus	2			9
				Gastropod sp.	2			9
				Inoceramus sp.	0.16			1.64
				INDET. bivalves	10			41
				Other/Indeterminate	3			13
			Sample dimensions (meters): 0.5 x 0.4 x 0.125	0.125-0.25 m Below		0.025	40
				Nymphalucina occidentalis	9.5			39	84.56	54	4
				Syncyclomena halli	1			5
				Euspira obliquata	1			5
				Baculites compressus	1			5
				Inoceramus sp.	1.14			5.56
				INDET. bivalves	6			25
			Sample dimensions (meters): 0.5 x 0.4 x 0.125	0.25-0.375 m Below		0.025	40
				Nymphalucina occidentalis	3			13	84.04	13	1
				Inoceramus sp.	15.26			62.04
				INDET. bivalves	2			9
			Sample dimensions (meters): 0.5 x 0.4 x 0.125	0.375-0.5 m Below		0.025	40
				Nymphalucina occidentalis	1			5	51.64	5	1
				Inoceramus sp.	3.66			15.64
				INDET. bivalves	4			17
				crab claw	2			9
				Other/Indeterminate	1			5
		Locality
		Non-Seep: 3504D
					Raw Abundance
				Horizon	*corrected for disartuclated bivalves	Total Volume	X (to m3)	Standardized	Plus 1	Total Abundance	Species Abundance	Species Richness
			Sample Dimensions (meters): 0.9 x 0.6 x 0.125	1.0-.875 m Above		V=.0675	14.81
				Nymphalucina occidentalis	4			5.924	6.924	13.8557	6.924	1
				Inoceramus sp.	0.33			0.48873	1.48873
				INDET. bivalves	3			4.443	5.443
			Sample Dimensions (meters): 0.9 x 0.6 x 0.125	0.875-0.75 m Above		V=.0675	14.81
				Nymphalucina occidentalis	1			1.481	2.481	16.5814	4.962	2
				Ostrea translucida	1			1.481	2.481
				Drepanochilus sp.	1			1.481	2.481
				Inoceramus sp.	0.82			1.21442	2.21442
				Other/Indeterminate	4			5.924	6.924
			Sample Dimensions (meters): 0.9 x 0.5 x 0.125	0.75-0.625 m Above		V=.05625	17.77
				Inoceramus sp.	2.316			4.11553	5.11553	5.11553	0	0
			Sample Dimensions (meters): 0.9 x 0.5 x 0.125	0.625-0.5 m Above		V=.05625	17.77
				Nymphalucina occidentalis	0.5			0.8885	1.8885	13.4181	1.8885	1
				Inoceramus sp.	1.8			3.1986	4.1986
				INDET. bivalves	2			3.554	4.554
				Other/Indeterminate	1			1.777	2.777
			Sample Dimensions (meters): 0.8 x 0.6 x 0.125	0.5-0.375 m Above		V=0.06	16.66
				Nymphalucina occidentalis	1.5			2.499	3.499	12.8798	6.165	2
				Ostrea translucida	1			1.666	2.666
				Inoceramus sp.	0.83			1.38278	2.38278
				INDET. bivalves	2			3.332	4.332
			Sample Dimensions (meters): 0.9 x 0.6 x 0.125	0.375-0.25 m Above		V=.0675	14.81
				Inoceramus sp.	1.16			1.71796	2.71796	7.42046	0	0
				Bivalve sp.	2.5			3.7025	4.7025
			Sample Dimensions (meters): 0.8 x 0.6 x 0.125	0.25-0.125 m Above		V=0.06	16.66
				Ostrea translucida	1			1.666	2.666	9.09756	2.666	1
				Inoceramus sp.	0.66			1.09956	2.09956
				INDET. bivalves	2			3.332	4.332
			Sample Dimensions (meters): 0.8 x 0.6 x 0.125	0.125-0 m Above		V=0.06	16.66
				Nymphalucina occidentalis	1			1.666	2.666	13.9631	7.998	3
				Linearia contraca	1			1.666	2.666
				Vanikoropsis nebrascensis	1			1.666	2.666
				Drepanochilus sp.	1			1.666	2.666
				Inoceramus sp.	1.38			2.29908	3.29908
			Sample Dimensions (meters): 0.8 x 0.6 x 0.125	Bentonite- 0 m		V=0.06	16.66
				Ostrea translucida	2			3.332	4.332	9.93556	6.998	2
				Parallelodon sulcatinus	1			1.666	2.666
				Inoceramus sp.	1.163			1.93756	2.93756
			Sample Dimensions (meters): 0.8 x 0.6 x 0.125	0- 0.125 m Below		V=0.06	16.66
				Nymphalucina occidentalis	4.5			7.497	8.497	53.1831	34.489	7
				Limopsis parvula	1			1.666	2.666
				Trachytriton vinculum	1			1.666	2.666
				Vanikoropsis nebrascensis	4			6.664	7.664
				Drepanochilus nebrascensis	4			6.664	7.664
				Drepanochilus scotti	1			1.666	2.666
				Bivalve sp. 1	1			1.666	2.666
				Inoceramus sp.	1.82			3.03212	4.03212
				Gastropod sp.	1			1.666	2.666
				INDET. bivalves	3			4.998	5.998
				Other/Indeterminate	3			4.998	5.998
			Sample Dimensions (meters): 0.8 x 0.6 x 0.125	0.125-0.25 m Below		V=0.06	16.66
				Nymphalucina occidentalis	5			8.33	9.33	41.2933	20.66	4
				Pseudoptera subtortuosa	1			1.666	2.666
				Nuculana scitula	2			3.332	4.332
				Drepanochilus nebrascensis	2			3.332	4.332
				Inoceramus sp.	2.324			3.87178	4.87178
				Gastropod sp.	2			3.332	4.332
				INDET. bivalves	2.66			4.43156	5.43156
				Other/Indeterminate	3			4.998	5.998
			Sample Dimensions (meters): 0.8 x 0.6 x 0.125	0.25-0.375 m Below		V=0.06	16.66
				Nymphalucina occidentalis	3			4.998	5.998	27.9079	12.996	3
				Nuculana scitula	2			3.332	4.332
				Drepanochilus nebrascensis	1			1.666	2.666
				Inoceramus sp.	1.49			2.48234	3.48234
				INDET. gastropod	2			3.332	4.332
				INDET. bivalves	3.66			6.09756	7.09756
			Sample Dimensions (meters): 1.0 x 0.5 x 0.125	0.375-0.5 m Below		V=0.0625	16
				Nymphalucina occidentalis	10			16	17	95.9392	41.6	7
				Parallelodon sulcatinus	1			1.6	2.6
				Linearia contracta	1			1.6	2.6
				Syncyclomena halli	1			1.6	2.6
				Nuculana scitula	3			4.8	5.8
				Ostrea translucida	3			4.8	5.8
				Cryptorhytis cheyennensis	1			1.6	2.6
				Inoceramus sp.	8.162			13.0592	14.0592
				Placenticeras intercalare	1			1.6	2.6
				Crab fragment	1			1.6	2.6
				INDET. bivalves	11.3			18.08	19.08
				Other/Indeterminate	11			17.6	18.6

## Sheet: G49372
Brophy, S.K., et al., 2022, Methane seeps as refugia during ash falls in the Late Cretaceous Western Interior Seaway of North America: Geology, https://doi.org/10.1130/G49372.1

## Sheet: 3504A combined
Standardized abundance of A and A' combined
	Horizon	Standardized Abundances
	1.0-.875 Above	*Combined A and A'	Total halved	Final Total Abundance	Species Abundance	Species Richness
	Nymphalucina occidentalis	211.6	105.8	288.936	155.1	13
	Inoceramus altusiformis	4.2	2.1
	"Cataceramus" gandjaensis	5	2.5
	Baculites compressus	33.2	16.6
	Trachytriton vinculum	4.2	2.1
	Syncyclomena halli	5	2.5
	Nuculana scitula	5	2.5
	Nucula sp 1.	5	2.5
	Hoploscaphites brevis	5	2.5
	Hoploscaphites nodosus	9	4.5
	Astandes densatus	5	2.5
	Vanikoropsis nebrascensis	13	6.5
	Cryptorhytis cheyennensis	5	2.5
	Hoploscaphites sp.	13	6.5
	Crab frags, claw/legs	13	6.5
	Baculites sp.	51.6	25.8
	Inoceramus sp.	81.552	40.776
	Fragmented ammonite	5	2.5
	INDET bivalves	103.52	51.76
	0.875-0.75 m Above
	Nymphalucina occidentalis	174.8	87.4	227.784	123.2	13
	Pteria linguiformis	5.8	2.9
	Anomia gryphorhyncha	2.6	1.3
	Ostrea translucida	2.6	1.3
	Parallelodon sulcatinus	2.6	1.3
	Protocardia subquadrata	2.6	1.3
	Baculites compressus	29.2	14.6
	Gervillia sp.1	4.2	2.1
	Hoploscaphites brevis	5.8	2.9
	Drepanochilus nebrascensis	2.6	1.3
	Euspira obliquata	6.8	3.4
	Inoceramus nebrascensis	2.6	1.3
	Syncyclomena halli	4.2	2.1
	worm tube	2.6	1.3
	Crab fragment	2.6	1.3
	bryozoan	2.6	1.3
	INDET bivalves	99.056	49.528
	Baculites sp.	2.6	1.3
	Inoceramus sp.	75.312	37.656
	Other/Indeterminate	24.4	12.2
	0.75-0.625 m Above
	Nymphalucina occidentalis	60.4	30.2	106.088	37.3	4
	Baculites compressus	4.2	2.1
	Nuculana scitula	5	2.5
	Hoploscaphites brevis	5	2.5
	Inoceramus sp.	66.832	33.416
	INDET bivalves	53.744	26.872
	Other/Indeterminate	17	8.5
	0.625-0.5 m Above
	Nymphalucina occidentalis	118	59	170.96	75.5	5
	Nuculana scitula	18	9
	Ostrea translucida	5	2.5
	Hoploscaphites brevis	5	2.5
	Baculites corrugatus	5	2.5
	Inoceramus sp.	34.52	17.26
	gastropod sp.	5	2.5
	Baculites sp.	5	2.5
	INDET bivalves	104.4	52.2
	Crab fragment/claw	5	2.5
	Other/Indeterminate	37	18.5
	0.5-0.375 Above
	Nymphalucina occidentalis	43	21.5	80.664	76.4	7
	Nuculana scitula	5	2.5
	Nuculana gardensis	5	2.5
	Syncyclomena halli	5	2.5
	Ostrea translucida	13.2	6.6
	Limopsis parvula	2.6	1.3
	Inoceramus convexus	2.6	1.3
	Inoceramus sp.	29.648	14.824
	INDET bivalves	55.28	27.64
	0.375-0.25 m Above
	Nymphalucina occidentalis	97.2	48.6	91.78	68.7	10
	Parapholus sp. A?	5	2.5
	Nuculana gardensis	5	2.5
	Nuculana scitula	2.6	1.3
	Pteria linguiformis	2.6	1.3
	Syncyclomena halli	5	2.5
	Ostrea translucida	5	2.5
	Clisocolus (moreauensis?)	5	2.5
	Bivalve sp. 2	5	2.5
	Baculites corrugatus	5	2.5
	Inoceramus sp.	22.96	11.48
	INDET. bivalves	23.2	11.6
	0.25-0.125 m Above
	Nymphalucina occidentalis	57.2	28.6	72.232	36.2	5
	Nuculana scitula	5	2.5
	Baculites compressus	5	2.5
	Hoploscaphites brevis	2.6	1.3
	Eutrephoceras dekayi nebrascensis	2.6	1.3
	Inoceramus sp.	35.264	17.632
	INDET. bivalves	19.8	9.9
	Other/Indeterminate	17	8.5
	0.125-0 m Above
	Nymphalucina occidentalis	52.4	26.2	105.428	41.2	7
	Solemaya subplicata	7.4	3.7
	Bivalve sp. 2	2.6	1.3
	Euspria obliquata	7.4	3.7
	Anisomyon borealis	4.2	2.1
	Micrabacia americana	4.2	2.1
	Coral sp 1.	4.2	2.1
	Inoceramus sp.	35.536	17.768
	INDET. bivalves	72.72	36.36
	Other/Indeterminate	20.2	10.1
	Bentonite
	Nymphalucina occidentalis	30	15	31.1285	21.8	4
	Baculites compressus	6.8	3.4
	Hoploscaphites brevis	4.2	2.1
	Micrabacia americana	2.6	1.3
	Inoceramus sp.	5.977	2.9885
	INDET bivalves	12.68	6.34
	0-0.125 m Below
	Nymphalucina occidentalis	62	31	91.18	46.8	7
	Syncyclomena halli	4.2	2.1
	Cymbophora nitidula	4.2	2.1
	Baculites compressus	4.2	2.1
	Crytodaria minuta	5	2.5
	Margaritella sp 1.	5	2.5
	Baculites compressus	9	4.5
	Inoceramus sp.	3.6	1.8
	INDET bivalves	55.76	27.88
	INDET gastropod	9	4.5
	Other/Indeterminate	20.4	10.2
	0.125-0.25 m Below
	Nymphalucina occidentalis	75.2	37.6	114.916	56.1	9
	Nuculana scitula	4.2	2.1
	Modiolus sp 1.	4.2	2.1
	Inoceramus altus	4.2	2.1
	Baculites compressus	9.2	4.6
	Syncyclomena halli	5	2.5
	Euspira obliquata	5	2.5
	Bivale sp. 1	2.6	1.3
	Bivalve sp. 2	2.6	1.3
	Baculites sp.	4.2	2.1
	Inoceramus sp.	22.432	11.216
	INDET bivalves	58	29
	Other/Indeterminate	33	16.5
	0.25-0.375 m Below
	Nymphalucina occidentalis	46	23	71.7	25.1	2
	Anomia gryphorhyncha	4.2	2.1
	Inoceramus sp.	62.04	31.02
	INDET bivalves	20.56	10.28
	Other/Indeterminate	10.6	5.3
	0.5-0.375 m Below
	Nymphalucina occidentalis	12.4	6.2	36.8344	8.3	2
	Micrabacia americana	4.2	2.1
	Inoceramus sp.	17.7088	8.8544
	INDET bivalves	25.36	12.68
	crab fragment	9	4.5
	Other/Indeterminate	5	2.5

## Sheet: Standard Error on Abundance
Abundance Standard Error
	Locality					Locality
	3504 A + A' (Seep)					3504D (Non-Seep)
	Horizon	Abundance	Std. Error			Horizon	Abundance	Std. Error
	1.0-.875 Above		5.99428			1.0-.875 m Above		1.62227
	Nymphalucina occidentalis	105.8				Nymphalucina occidentalis	6.924
	Inoceramus altusiformis	2.1				Inoceramus sp.	1.48873
	"Cataceramus" gandjaensis	2.5				INDET bivalves	5.443
	Baculites compressus	16.6
	Trachytriton vinculum	2.1				0.875-0.75 m Above		0.903405
	Syncyclomena halli	2.5				Nymphalucina occidentalis	2.481
	Nuculana scitula	2.5				Ostrea translucida	2.481
	Nucula sp 1.	2.5				Drepanochilus sp.	2.481
	Hoploscaphites brevis	2.5				Inoceramus sp.	2.21442
	Hoploscaphites nodosus	4.5				Other/Indeterminate	6.924
	Astandes densatus	2.5
	Vanikoropsis nebrascensis	6.5
	Cryptorhytis cheyennensis	2.5				0.75-0.625 m Above		0
	Hoploscaphites sp.	6.5				Inoceramus sp.	5.11553
	Crab frags, claw/legs	6.5
	Baculites sp.	25.8
	Inoceramus sp.	40.776				0.625-0.5 m Above		0.621421
	Fragmented ammonite	2.5				Nymphalucina occidentalis	1.8885
	INDET Bivalves	51.76				Inoceramus sp.	4.1986
						INDET bivalves	4.554
	0.875-0.75 m Above		4.95548			Other/Indeterminate	2.777
	Nymphalucina occidentalis	87.4
	Pteria linguiformis	2.9				0.5-0.375 m Above		0.439909
	Anomia gryphorhyncha	1.3				Nymphalucina occidentalis	3.499
	Ostrea translucida	1.3				Ostrea translucida	2.666
	Parallelodon sulcatinus	1.3				Inoceramus sp.	2.38278
	Protocardia subquadrata	1.3				INDET bivalves	4.332
	Baculites compressus	14.6
	Gervillia sp.1	2.1				0.375-0.25 m Above		0.99227
	Hoploscaphites brevis	2.9				Inoceramus sp.	2.71796
	Drepanochilus nebrascensis	1.3				INDET bivavlve	4.7025
	Euspira obliquata	3.4
	Inoceramus nebrascensis	1.3
	Syncyclomena halli	2.1				0.25-0.125 m Above		0.67
	worm tube	1.3				Ostrea translucida	2.666
	Crab fragment	1.3				Inoceramus sp.	2.09956
	bryozoan	1.3				INDET bivalves	4.332
	INDET bivalve	49.528
	Baculites sp.	1.3				0.125-0 m Above		0.126616
	Inoceramus sp.	37.656				Nymphalucina occidentalis	2.666
	Other/Indeterminate	12.2				Linearia contraca	2.666
						Vanikoropsis nebrascensis	2.666
	0.75-0.625 m Above		5.4163			Drepanochilus sp.	2.666
	Nymphalucina occidentalis	30.2				Inoceramus sp.	3.29908
	Baculites compressus	2.1
	Nuculana scitula	2.5				Bentonite- 0 m		0.516062
	Hoploscaphites brevis	2.5				Ostrea translucida	4.332
	Inoceramus sp.	33.416				Parallelodon sulcatinus	2.666
	INDET bivalves	26.872				Inoceramus sp.	2.93756
	Other/Indeterminate	8.5
						0- 0.125 m Below		0.715347
	0.625-0.5 m Above		6.2577			Nymphalucina occidentalis	8.497
	Nymphalucina occidentalis	59				Limopsis parvula	2.666
	Nuculana scitula	9				Trachytriton vinculum	2.666
	Ostrea translucida	2.5				Vanikoropsis nebrascensis	7.664
	Hoploscaphites brevis	2.5				Drepanochilus nebrascensis	7.664
	Baculites corrugatus	2.5				Drepanochilus scotti	2.666
	Inoceramus sp.	17.26				Bivalve sp. 1	2.666
	INDET gastropod	2.5				Inoceramus sp.	4.03212
	Baculites sp.	2.5				INDET gastropod	2.666
	INDET bivalves	52.2				INDET bivalve	5.998
	Crab fragment/claw	2.5				Other/Indeterminate	5.998
	Other/Indeterminate	18.5
						0.125-0.25 m Below		0.688227
	0.5-0.375 Above		3.3097			Nymphalucina occidentalis	9.33
	Nymphalucina occidentalis	21.5				Pseudoptera subtortuosa	2.666
	Nuculana scitula	2.5				Nuculana scitula	4.332
	Nuculana gardensis	2.5				Drepanochilus nebrascensis	4.332
	Syncyclomena halli	2.5				Inoceramus sp.	4.87178
	Ostrea translucida	6.6				INDET gastropod	4.332
	Limopsis parvula	1.3				INDET bivalves	5.43156
	Inoceramus convexus	1.3				Other/Indeterminate	5.998
	Inoceramus sp.	14.824
	INDET bivalves	27.64				0.25-0.375 m Below		0.666073
						Nymphalucina occidentalis	5.998
	0.375-0.25 m Above		3.8666			Nuculana scitula	4.332
	Nymphalucina occidentalis	48.6				Drepanochilus nebrascensis	2.666
	Parapholus sp. A?	2.5				Inoceramus sp.	3.48234
	Nuculana gardensis	2.5				INDET gastropod	4.332
	Nuculana scitula	1.3				INDET bivalves	7.09756
	Pteria linguiformis	1.3
	Syncyclomena halli	2.5				0.375-0.5 m Below		2.01787
	Ostrea translucida	2.5				Nymphalucina occidentalis	17
	Clisocolus (moreauensis?)	2.5				Parallelodon sulcatinus	2.6
	Bivalve sp. 2	2.5				Linearia contracta	2.6
	Baculites corrugatus	2.5				Syncyclomena halli	2.6
	Inoceramus sp.	11.48				Nuculana scitula	5.8
	INDET bivalve	11.6				Ostrea translucida	5.8
						Cryptorhytis cheyennensis	2.6
	0.25-0.125 m Above		3.44032			Inoceramus sp.	14.0592
	Nymphalucina occidentalis	28.6				Placenticeras intercalare	2.6
	Nuculana scitula	2.5				Crab fragment	2.6
	Baculites compressus	2.5				INDET bivalves	19.08
	Hoploscaphites brevis	1.3				Other/Indeterminate	18.6
	Eutrephoceras dekayi nebrascensis	1.3
	Inoceramus sp.	17.632
	INDET bivalves	9.9
	Other/Indeterminate	8.5
	0.125-0 m Above		3.883
	Nymphalucina occidentalis	26.2
	Solemaya subplicata	3.7
	Bivalve sp. 2	1.3
	Euspria obliquata	3.7
	Anisomyon borealis	2.1
	Micrabacia americana	2.1
	Coral sp 1.	2.1
	Inoceramus sp.	17.768
	INDET bivalves	36.36
	Other/Indeterminate	10.1
	Bentonite		2.08398
	Nymphalucina occidentalis	15
	Baculites compressus	3.4
	Hoploscaphites brevis	2.1
	Micrabacia americana	1.3
	Inoceramus sp.	2.9885
	INDET bivalves	6.34
	0-0.125 m Below		3.24178
	Nymphalucina occidentalis	31
	Syncyclomena halli	2.1
	Cymbophora nitidula	2.1
	Baculites compressus	2.1
	Crytodaria minuta	2.5
	Margaritella sp 1.	2.5
	Baculites compressus	4.5
	Inoceramus sp.	1.8
	INDET bivalves	27.88
	Gastropod sp.	4.5
	Other/Indeterminate	10.2
	0.125-0.25 m Below		3.29303
	Nymphalucina occidentalis	37.6
	Nuculana scitula	2.1
	Modiolus sp 1.	2.1
	Inoceramus altus	2.1
	Baculites compressus	4.6
	Syncyclomena halli	2.5
	Euspira obliquata	2.5
	Bivale sp. 1	1.3
	Bivalve sp. 2	1.3
	Baculites sp.	2.1
	Inoceramus sp.	11.216
	INDET bivalves	29
	Other/Indeterminate	16.5
	0.25-0.375 m Below		5.48289
	Nymphalucina occidentalis	23
	Anomia gryphorhyncha	2.1
	Inoceramus sp.	31.02
	INDET bivalves	10.28
	Unknowns	5.3
	0.5-0.375 m Below		1.65735
	Nymphalucina occidentalis	6.2
	Micrabacia americana	2.1
	Inoceramus sp.	8.8544
	INDET bivalves	12.68
	crab fragment	4.5
	Other/Indeterminate	2.5

## Sheet: Simpson's D Standardized to Max
Simpson's D- Standardization to the Maximum
		Locality											Locality
*most common taxon per sample given value of 1, all other taxa in sample scaled to it.		3504 A + A' (Seep)											3504D (Non-Seep)
1 was then added to each standardized abundance to avoid negative abundances
*Simpson's D was then calculated		1.0-.875 Above				N	n(n-1)	Σ(n(n-1))	D	1-D			1.0-.875 m Above			N	n(n-1)	Σ(n(n-1))	D	1-D
		Nymphalucina occidentalis	105.8	1	2	14.466	2	2.50087	0.0128383	0.987162			Nymphalucina occidentalis	6.924	2	2	2	2	1	0
		Inoceramus altusiformis	2.1	0.0198488	1.01985		0.0202427
		"Cataceramus" gandjaensis	2.5	0.0236295	1.02363		0.0241878						0.875-0.75 m Above
		Baculites compressus	16.6	0.1569	1.1569		0.181517						Nymphalucina occidentalis	2.481	2	4	2	4	0.333333	0.666667
		Trachytriton vinculum	2.1	0.0198488	1.01985		0.0202427						Ostrea translucida	2.481	2		2
		Syncyclomena halli	2.5	0.0236295	1.02363		0.0241878
		Nuculana scitula	2.5	0.0236295	1.02363		0.0241878						0.75-0.625 m Above	0						0
		Nucula sp 1.	2.5	0.0236295	1.02363		0.0241878
		Hoploscaphites brevis	2.5	0.0236295	1.02363		0.0241878						0.625-0.5 m Above
		Hoploscaphites nodosus	4.5	0.0425331	1.04253		0.0443421						Nymphalucina occidentalis	1.885						0
		Astandes densatus	2.5	0.0236295	1.02363		0.0241878
		Vanikoropsis nebrascensis	6.5	0.0614367	1.06144		0.0652111						0.5-0.375 m Above
		Cryptorhytis cheyennensis	2.5	0.0236295	1.02363		0.0241878						Nymphalucina occidentalis	3.449	2	3.77124	2	3.36605	0.322079	0.677921
													Ostrea translucida	2.66	1.77124		1.36605
		0.875-0.75 m Above
		Nymphalucina occidentalis	87.4	1	2		2	2.44371	0.0126468	0.987353			0.375-0.25 m Above							0
		Pteria linguiformis	2.9	0.0331808	1.03318	14.4096	0.0342817							0
		Anomia gryphorhyncha	1.3	0.0148741	1.01487		0.0150954
		Ostrea translucida	1.3	0.0148741	1.01487		0.0150954						0.25-0.125 m Above
		Parallelodon sulcatinus	1.3	0.0148741	1.01487		0.0150954						Ostrea translucida	2.66						0
		Protocardia subquadrata	1.3	0.0148741	1.01487		0.0150954
		Baculites compressus	14.6	0.167048	1.16705		0.194953						0.125-0 m Above
		Gervillia sp.1	2.1	0.0240275	1.02403		0.0246048						Nymphalucina occidentalis	2.66	2	6	2	6	0.2	0.8
		Hoploscaphites brevis	2.9	0.0331808	1.03318		0.0342817						Linearia contraca	2.66	2		2
		Drepanochilus nebrascensis	1.3	0.0148741	1.01487		0.0150954						Vanikoropsis nebrascensis	2.66	2		2
		Euspira obliquata	3.4	0.0389016	1.0389		0.0404149
		Inoceramus nebrascensis	1.3	0.0148741	1.01487		0.0150954						Bentonite- 0 m
		Syncyclomena halli	2.1	0.0240275	1.02403		0.0246048						Ostrea translucida	4.332	2	3.61404	2	2.99107	0.316609	0.683391
													Parallelodon sulcatinus	2.66	1.61404		0.991074
		0.75-0.625 m Above
		Nymphalucina occidentalis	30.2	1	2	5.2351	2	2.25364	0.101647	0.898353			0- 0.125 m Below
		Baculites compressus	2.1	0.0695364	1.06954		0.0743717						Nymphalucina occidentalis	8.497	2	11.059	2	7.07982	0.0636436	0.936356
		Nuculana scitula	2.5	0.0827815	1.08278		0.0896342						Limopsis parvula	2.666	1.31376		0.412202
		Hoploscaphites brevis	2.5	0.0827815	1.08278		0.0896342						Trachytriton vinculum	2.666	1.31376		0.412202
													Vanikoropsis nebrascensis	7.664	1.90197		1.71551
		0.625-0.5 m Above											Drepanochilus nebrascensis	7.664	1.90197		1.71551
		Nymphalucina occidentalis	59	2	6.27966	2	2.30832	0.0696231	0.930377				Drepanochilus scotti	2.666	1.31376		0.412202
		Nuculana scitula	9	1.15254		0.175812							Bivalve sp. 1	2.666	1.31376		0.412202
		Ostrea translucida	2.5	1.04237		0.0441683
		Hoploscaphites brevis	2.5	1.04237		0.0441683							0.125-0.25 m Below
		Baculites corrugatus	2.5	1.04237		0.0441683							Nymphalucina occidentalis	9.33	2	6.21436	2	3.72718	0.115022	0.884978
													Pseudoptera subtortuosa	2.666	1.28574		0.367395
		0.5-0.375 Above											Nuculana scitula	4.332	1.46431		0.679891
		Nymphalucina occidentalis	21.5	2	8.77674	2	2.91885	0.0427643	0.957236				Drepanochilus nebrascensis	4.332	1.46431		0.679891
		Nuculana scitula	2.5	1.11628		0.1298
		Nuculana gardensis	2.5	1.11628		0.1298							0.25-0.375 m Below							0.819497
		Syncyclomena halli	2.5	1.11628		0.1298							Nymphalucina occidentalis	5.998	2	5.16672	2	3.88592	0.180503
		Ostrea translucida	6.6	1.30698		0.401211							Nuculana scitula	4.332	1.72224		1.24387
		Limopsis parvula	1.3	1.06047		0.0641211							Drepanochilus nebrascensis	2.666	1.44448		0.642045
		Inoceramus convexus	1.3	1.06047		0.0641211
													0.375-0.5 m Below
		0.375-0.25 m Above											Nymphalucina occidentalis	17	2	10.4471	2	3.79682	0.0384706	0.961529
		Nymphalucina occidentalis	48.6	2	11.4136	2	2.43353	0.0204746	0.979525				Parallelodon sulcatinus	2.6	1.15294		0.176332
		Parapholus sp. A?	2.5	1.05144		0.0540864							Linearia contracta	2.6	1.15294		0.176332
		Nuculana gardensis	2.5	1.05144		0.0540864							Syncyclomena halli	2.6	1.15294		0.176332
		Nuculana scitula	1.3	1.02675		0.0274645							Nuculana scitula	5.8	1.34118		0.457578
		Pteria linguiformis	1.3	1.02675		0.0274645							Ostrea translucida	5.8	1.34118		0.457578
		Syncyclomena halli	2.5	1.05144		0.0540864							Cryptorhytis cheyennensis	2.6	1.15294		0.176332
		Ostrea translucida	2.5	1.05144		0.0540864							Placenticeras intercalare	2.6	1.15294		0.176332
		Clisocolus (moreauensis?)	2.5	1.05144		0.0540864
		Bivalve sp. 2	2.5	1.05144		0.0540864
		Baculites corrugatus	2.5	1.05144		0.0540864
		0.25-0.125 m Above
		Nymphalucina occidentalis	28.6	2	6.26573	2	2.28515	0.0692602	0.93074
		Nuculana scitula	2.5	1.08741		0.0950535
		Baculites compressus	2.5	1.08741		0.0950535
		Hoploscaphites brevis	1.3	1.04545		0.0475207
		Eutrephoceras dekayi nebrascensis	1.3	1.04545		0.0475207
		0.125-0 m Above
		Nymphalucina occidentalis	26.2	2	8.57252	2	2.63414	0.040578	0.959422
		Solemaya subplicata	3.7	1.14122		0.161165
		Bivalve sp. 2	1.3	1.04962		0.0520803
		Euspria obliquata	3.7	1.14122		0.161165
		Anisomyon borealis	2.1	1.08015		0.0865771
		Micrabacia americana	2.1	1.08015		0.0865771
		Coral sp 1.	2.1	1.08015		0.0865771
		Bentonite
		Nymphalucina occidentalis	15	2	5.45333	2	2.53182	0.104252	0.895748
		Baculites compressus	3.4	1.22667		0.278044
		Hoploscaphites brevis	2.1	1.14		0.1596
		Micrabacia americana	1.3	1.08667		0.0941778
		0-0.125 m Below
		Nymphalucina occidentalis	31	2	8.50968	2	2.55752	0.0400208	0.959979
		Syncyclomena halli	2.1	1.06774		0.0723309
		Cymbophora nitidula	2.1	1.06774		0.0723309
		Baculites compressus	2.1	1.06774		0.0723309
		Crytodaria minuta	2.5	1.08065		0.0871488
		Margaritella sp 1.	2.5	1.08065		0.0871488
		Baculites compressus	4.5	1.14516		0.166233
		0.125-0.25 m Below
		Nymphalucina occidentalis	37.6	2	10.492	2	2.52758	0.0253797	0.97462
		Nuculana scitula	2.1	1.05585		0.0589704
		Modiolus sp 1.	2.1	1.05585		0.0589704
		Inoceramus altus	2.1	1.05585		0.0589704
		Baculites compressus	4.6	1.12234		0.137308
		Syncyclomena halli	2.5	1.06649		0.0709102
		Euspira obliquata	2.5	1.06649		0.0709102
		Bivale sp. 1	1.3	1.03457		0.0357699
		Bivalve sp. 2	1.3	1.03457		0.0357699
		0.25-0.375 m Below
		Nymphalucina occidentalis	23	2	3.0913	2	2.09964	0.324778	0.675222
		Anomia gryphorhyncha	2.1	1.0913		0.0996408
		0.5-0.375 m Below
		Nymphalucina occidentalis	6.2	2	3.33871	2	2.45343	0.31421	0.68579
		Micrabacia americana	2.1	1.33871		0.453434
